# Supplementary material for: Lower Blood Pressure After Transcatheter or Surgical Aortic Valve Replacement is Associated with Increased Mortality
Source: PubMed Central journal article supplement — J Am Heart Assoc. 2019 Oct 31;8(21):e014020. doi: 10.1161/JAHA.119.014020 (PMC6898800; doi:10.1161/jaha.119.014020), 2019-10-31
Supplement: JAH3-8-e014020-s001.pdf [file JAH3-8-e014020-s001.pdf]

# **SUPPLEMENTAL MATERIAL**

**Table S1. Univariable associations with mortality between 30 days and 1 year.**

|                                         | <b>HR (95% CI)</b> | <b>p-value</b> |
|-----------------------------------------|--------------------|----------------|
| <b>Clinical Variables</b>               |                    |                |
| TAVR (vs. SAVR)                         | 0.75 (0.58-0.97)   | 0.0272         |
| Age (per 5 year increase)               | 1.22 (1.11-1.34)   | < 0.0001       |
| Female Sex (Female vs male)             | 0.99 (0.78-1.26)   | 0.9498         |
| BMI                                     | 0.95 (0.93-0.97)   | < 0.0001       |
| NYHA (III/IV vs. I/II)                  | 2.50 (1.77-3.52)   | < 0.0001       |
| STS PROM                                | 1.10 (1.08-1.12)   | < 0.0001       |
| Diabetes mellitus                       | 1.06 (0.83-1.35)   | 0.6280         |
| Creatinine level >2 mg/dl               | 1.62 (0.91-2.89)   | 0.1017         |
| History of HTN                          | 1.26 (0.77-2.07)   | 0.3484         |
| Peripheral vascular disease             | 1.47 (1.15-1.86)   | 0.0017         |
| Prior stroke                            | 1.55 (1.11-2.18)   | 0.0109         |
| On home oxygen                          | 3.47 (2.66-4.52)   | < 0.0001       |
| Coronary artery disease                 | 1.47 (1.11-1.94)   | 0.0068         |
| Prior CABG                              | 1.00 (0.76-1.31)   | 0.9892         |
| Prior PCI                               | 1.17 (0.91-1.52)   | 0.2165         |
| Prior MI                                | 1.24 (0.94-1.63)   | 0.1342         |
| Prior Afib/flutter                      | 2.33 (1.84-2.95)   | < 0.0001       |
| Liver cirrhosis                         | 2.33 (1.15-4.70)   | 0.0186         |
| Immunosuppressive therapy               | 1.76 (1.27-2.43)   | 0.0007         |
| 5 meter gait speed (per 1 sec increase) | 1.01 (1.01-1.01)   | < 0.0001       |
| MMSE (per 1 point lower)                | 1.05 (1.09-1.01)   | 0.0142         |
| Does not live independently             | 2.98 (2.23-4.00)   | < 0.0001       |
| ADL deficits (per 1 less deficit)       | 0.71 (0.77-0.65)   | < 0.0001       |
| <b>Discharge echo parameters</b>        |                    |                |
| Ejection fraction                       | 0.99 (0.98-1.00)   | 0.0200         |
| LV mass index                           | 1.00 (1.00-1.01)   | 0.5333         |
| Mean gradient across aortic valve       | 1.00 (0.98-1.03)   | 0.7354         |

|                                                                                                                            |                   |          |
|----------------------------------------------------------------------------------------------------------------------------|-------------------|----------|
| Total aortic regurgitation (moderate/severe vs none/trace/mild)                                                            | 1.60 (1.00-2.56)  | 0.0482   |
| Mitral regurgitation (moderate/severe vs. none/trace/mild)                                                                 | 1.70 (1.13-2.55)  | 0.0102   |
| E/e' (mitral inflow E / average of mitral annular tissue Doppler early diastolic velocity at the septum and lateral walls) | 1.02 (1.01-1.04)  | 0.0046   |
| <b>Discharge medications</b>                                                                                               |                   |          |
| Diuretics                                                                                                                  | 1.88 (1.34-2.62)  | 0.0002   |
| Beta blockers                                                                                                              | 1.01 (0.76-1.33)  | 0.9685   |
| ACE inhibitors                                                                                                             | 1.01 (0.80-1.29)  | 0.9056   |
| Angiotensin receptor blockers                                                                                              | 0.68 (0.47-0.98)  | 0.0380   |
| <b>Clinical events (between procedure and 30 days)</b>                                                                     |                   |          |
| Early Reintervention (surgical or percutaneous)                                                                            | 4.52 (1.69-12.13) | 0.0027   |
| Early Stroke (any)                                                                                                         | 2.23 (1.44-3.45)  | 0.0003   |
| Early Life threatening or disabling bleed                                                                                  | 2.55 (1.88-3.46)  | < 0.0001 |
| Early Major bleed                                                                                                          | 2.08 (1.58-2.75)  | < 0.0001 |
| Early Major vascular complication                                                                                          | 1.42 (0.84-2.39)  | 0.1855   |
| Early Acute kidney injury                                                                                                  | 2.69 (2.01-3.58)  | < 0.0001 |
| Early Myocardial infarction                                                                                                | 3.44 (1.28-9.23)  | 0.0142   |
| New permanent pacemaker (in someone without one previously)                                                                | 1.14 (0.82-1.59)  | 0.4348   |

**Table S2. Multivariable model for factors associated with mortality between 30 days and 1 year\*.**

|                                                        | <b>HR (95% CI)</b> | <b>p-value</b> |
|--------------------------------------------------------|--------------------|----------------|
| <b>Clinical Variables</b>                              |                    |                |
| TAVR (vs. SAVR)**                                      | 0.82 (0.56, 1.21)  | 0.31           |
| BMI                                                    | 0.94 (0.91, 0.97)  | 0.0004         |
| NYHA (III/IV vs. I/II)                                 | 2.26 (1.35, 3.76)  | 0.0018         |
| Peripheral vascular disease                            | 1.40 (0.98, 1.99)  | 0.0017         |
| Prior stroke                                           | 1.55 (1.11-2.18)   | 0.0615         |
| On home oxygen                                         | 2.49 (1.58, 3.94)  | <0.0001        |
| Prior Afib/flutter                                     | 1.99 (1.41, 2.82)  | <0.0001        |
| Liver cirrhosis                                        | 2.46 (0.89, 6.82)  | 0.0835         |
| Immunosuppressive therapy                              | 1.70 (1.06, 2.73)  | 0.0286         |
| 5 meter gait speed                                     | 1.01 (1.00-1.01)   | 0.0060         |
| Does not live independently                            | 1.62 (0.95, 2.77)  | 0.0765         |
| <b>Clinical events (between procedure and 30 days)</b> |                    |                |
| Early Stroke (any)                                     | 2.00 (1.01, 3.96)  | 0.0482         |
| Early Life threatening or disabling bleed              | 1.68 (1.01, 2.78)  | 0.0457         |
| Early Major bleed                                      | 1.75 (1.15, 2.66)  | 0.0095         |
| Early Acute kidney injury                              | 2.84 (1.81, 4.46)  | <0.0001        |
| Early Myocardial infarction                            | 7.62 (3.80, 15.29) | <0.0001        |

\*Based on stepwise selection (entry/stay criteria of 0.1/0.1) of variable with a univariable association ( $p < 0.10$ ) with mortality between 30 days and 1 year (Table S1).

\*\*TAVR (vs. SAVR) was forced into the model.

**Table S3. Blood pressure at baseline, discharge, and 30 days.**

|                             | <b>All patients<br/>(n=2897)</b> | <b>TAVR<br/>(n=1794)</b> | <b>SAVR<br/>(n=1103)</b> |
|-----------------------------|----------------------------------|--------------------------|--------------------------|
| <b>SBP (mmHg)</b>           |                                  |                          |                          |
| <b>Baseline (pre-AVR)</b>   | n=2894                           | n=1792                   | n=1102                   |
| Mean $\pm$ SD               | 135.5 $\pm$ 20.0                 | 134.2 $\pm$ 19.0         | 137.7 $\pm$ 21.3         |
| <b>Discharge (post-AVR)</b> | n=2894                           | n=1792                   | n=1102                   |
| Mean $\pm$ SD               | 129.6 $\pm$ 18.1                 | 130.8 $\pm$ 17.7         | 127.6 $\pm$ 18.5         |
| <b>30 days (post-AVR)</b>   | n=2792                           | n=1751                   | n=1041                   |
| Mean $\pm$ SD               | 135.0 $\pm$ 20.0                 | 136.9 $\pm$ 20.4         | 131.8 $\pm$ 19.0         |
| <b>DBP (mmHg)</b>           |                                  |                          |                          |
| <b>Baseline (pre-AVR)</b>   | n=2894                           | n=1792                   | n=1102                   |
| Mean $\pm$ SD               | 68.9 $\pm$ 10.6                  | 68.0 $\pm$ 10.2          | 70.5 $\pm$ 11.2          |
| <b>Discharge (post-AVR)</b> | n=2894                           | n=1792                   | n=1102                   |
| Mean $\pm$ SD               | 61.9 $\pm$ 11.3                  | 60.7 $\pm$ 11.2          | 64.0 $\pm$ 11.0          |
| <b>30 days (post-AVR)</b>   | n=2791                           | n=1750                   | n=1041                   |
| Mean $\pm$ SD               | 66.9 $\pm$ 11.1                  | 66.0 $\pm$ 11.3          | 68.5 $\pm$ 10.8          |

TAVR, transcatheter aortic valve replacement; SAVR, surgical aortic valve replacement; SBP, systolic blood pressure; AVR, aortic valve replacement; DBP, diastolic blood pressure.

**Table S4. All-cause and Cardiovascular Mortality rates from 30 Days to 1 Year According to Early Post-AVR Diastolic Blood Pressure (DBP).**

| <b>Early Post-AVR DBP (mmHg)</b> | <b>N</b> | <b>All-cause mortality rate (n)</b> | <b>Cardiovascular mortality rate (n)</b> |
|----------------------------------|----------|-------------------------------------|------------------------------------------|
| <b>TAVR and SAVR combined</b>    |          |                                     |                                          |
| 30 to <40                        | 13       | 38.5% (5)                           | 38.5% (5)                                |
| 40 to <50                        | 129      | 23.0% (29)                          | 18.7% (23)                               |
| 50 to <60                        | 725      | 12.5% (89)                          | 8.5% (60)                                |
| 60 to <70                        | 1272     | 7.6% (95)                           | 4.4% (54)                                |
| 70 to <80                        | 623      | 8.2% (50)                           | 4.8% (29)                                |
| 80 to <90                        | 125      | 6.6% (8)                            | 2.6% (3)                                 |
| 90 to <100                       | 9        | 12.5% (1)                           | 12.5% (1)                                |
| <b>TAVR alone</b>                |          |                                     |                                          |
| 30 to <40                        | 12       | 33.3% (4)                           | 33.3% (4)                                |
| 40 to <50                        | 98       | 21.7% (21)                          | 17.8% (17)                               |
| 50 to <60                        | 502      | 13.1% (65)                          | 8.6% (42)                                |
| 60 to <70                        | 781      | 8.0% (62)                           | 5.0% (38)                                |
| 70 to <80                        | 341      | 9.8% (33)                           | 5.1% (17)                                |
| 80 to <90                        | 57       | 7.3% (4)                            | 2.0% (1)                                 |
| 90 to <100                       | 3        | 33.3% (1)                           | 33.3% (1)                                |
| <b>SAVR alone</b>                |          |                                     |                                          |
| 30 to <40                        | 1        | 100.0% (1)                          | 100.0% (1)                               |
| 40 to <50                        | 31       | 26.8% (8)                           | 21.6% (6)                                |
| 50 to <60                        | 223      | 11.1% (24)                          | 8.5% (18)                                |
| 60 to <70                        | 491      | 6.9% (33)                           | 3.4% (16)                                |
| 70 to <80                        | 282      | 6.2% (17)                           | 4.4% (12)                                |
| 80 to <90                        | 68       | 6.0% (4)                            | 3.1% (2)                                 |
| 90 to <100                       | 6        | 0.0% (0)                            | 0.0% (0)                                 |
|                                  |          |                                     |                                          |

AVR, aortic valve replacement; TAVR, transcatheter aortic valve replacement; SAVR, surgical aortic valve replacement.

**Table S5. All-cause and Cardiovascular Mortality rates from 30 Days to 1 Year According to Early Post-AVR Systolic Blood Pressure (SBP).**

| Early Post-AVR SBP (mmHg)     | N   | All-cause mortality rate (n) | Cardiovascular mortality rate (n) |
|-------------------------------|-----|------------------------------|-----------------------------------|
| <b>TAVR and SAVR combined</b> |     |                              |                                   |
| 90 to <100                    | 23  | 26.1% (6)                    | 9.4% (2)                          |
| 100 to <110                   | 151 | 16.1% (24)                   | 13.0% (19)                        |
| 110 to <120                   | 448 | 12.9% (57)                   | 8.8% (38)                         |
| 120 to <130                   | 700 | 8.9% (61)                    | 5.1% (35)                         |
| 130 to <140                   | 705 | 8.8% (61)                    | 5.9% (40)                         |
| 140 to <150                   | 491 | 7.7% (37)                    | 4.6% (22)                         |
| 150 to <160                   | 260 | 9.0% (23)                    | 5.6% (14)                         |
| 160 to <170                   | 83  | 6.1% (5)                     | 3.7% (3)                          |
| 170 to <180                   | 36  | 8.5% (3)                     | 5.7% (2)                          |
| <b>TAVR alone</b>             |     |                              |                                   |
| 90 to <100                    | 15  | 20.0% (3)                    | 6.7% (1)                          |
| 100 to <110                   | 79  | 20.4% (16)                   | 18.1% (14)                        |
| 110 to <120                   | 228 | 13.7% (31)                   | 7.8% (17)                         |
| 120 to <130                   | 405 | 9.9% (40)                    | 6.5% (26)                         |
| 130 to <140                   | 469 | 10.1% (47)                   | 6.6% (30)                         |
| 140 to <150                   | 324 | 8.7% (28)                    | 5.6% (18)                         |
| 150 to <160                   | 188 | 9.7% (18)                    | 5.5% (10)                         |
| 160 to <170                   | 61  | 8.3% (5)                     | 5.1% (3)                          |
| 170 to <180                   | 25  | 8.3% (2)                     | 4.3% (1)                          |
| <b>SAVR alone</b>             |     |                              |                                   |
| 90 to <100                    | 8   | 37.5% (3)                    | 16.7% (1)                         |
| 100 to <110                   | 72  | 11.4% (8)                    | 7.3% (5)                          |
| 110 to <120                   | 220 | 12.1% (26)                   | 9.9% (21)                         |
| 120 to <130                   | 295 | 7.4% (21)                    | 3.2% (9)                          |
| 130 to <140                   | 236 | 6.1% (14)                    | 4.4% (10)                         |
| 140 to <150                   | 167 | 5.7% (9)                     | 2.5% (4)                          |

|             |    |          |          |
|-------------|----|----------|----------|
| 150 to <160 | 72 | 7.1% (5) | 5.8% (4) |
| 160 to <170 | 22 | 0.0% (0) | 0.0% (0) |
| 170 to <180 | 11 | 9.1% (1) | 9.1% (1) |
|             |    |          |          |

AVR, aortic valve replacement; TAVR, transcatheter aortic valve replacement; SAVR, surgical aortic valve replacement.



**Table S6. Clinical Outcomes According to Early Post-AVR DBP and SBP (all TAVR and SAVR patients).**

| <b>Early Post-AVR Diastolic Blood Pressure (DBP)</b> |                                                                                                                                |                                           |                                               |                                               |                               |                                                      |
|------------------------------------------------------|--------------------------------------------------------------------------------------------------------------------------------|-------------------------------------------|-----------------------------------------------|-----------------------------------------------|-------------------------------|------------------------------------------------------|
|                                                      | <b>Adjusted* HR (95% CI) for each group compared to referent 60 to &lt;80 (additionally adjusted for early post-AVR SBP)</b>   |                                           |                                               |                                               |                               |                                                      |
| <b>Early Post-AVR DBP (mmHg)</b>                     | 30 day to 1 year all-cause mortality                                                                                           | 30 day to 1 year cardiovascular mortality | 30 day to 1 year NON-cardiovascular mortality | 30 day to 1 year aortic valve hospitalization | 30 day to 1 year stroke (all) | 30 day to 1 year myocardial infarction (spontaneous) |
| 30 to <60                                            | 1.51 (1.13, 2.01)                                                                                                              | 2.02 (1.41, 2.88)                         | 0.84 (0.50, 1.41)                             | 1.49 (1.09, 2.05)                             | 1.39 (0.81, 2.41)             | 1.32 (0.47, 3.74)                                    |
| 60 to <80 (reference)                                | 1.0                                                                                                                            | 1.0                                       | 1.0                                           | 1.0                                           | 1.0                           | 1.0                                                  |
| 80 to <100                                           | 1.30 (0.63, 2.70)                                                                                                              | 0.85 (0.26, 2.75)                         | 1.91 (0.74, 4.96)                             | 1.18 (0.51, 2.71)                             | 0.35 (0.05, 2.58)             | 3.12 (0.66, 14.79)                                   |
| <b>Early Post-AVR Systolic Blood Pressure (SBP)</b>  |                                                                                                                                |                                           |                                               |                                               |                               |                                                      |
|                                                      | <b>Adjusted* HR (95% CI) for each group compared to referent 120 to &lt;150 (additionally adjusted for early post-AVR DBP)</b> |                                           |                                               |                                               |                               |                                                      |
| <b>Early Post-AVR SBP (mmHg)</b>                     | 30 day to 1 year all-cause mortality                                                                                           | 30 day to 1 year cardiovascular mortality | 30 day to 1 year NON-cardiovascular mortality | 30 day to 1 year aortic valve hospitalization | 30 day to 1 year stroke (all) | 30 day to 1 year myocardial infarction (spontaneous) |
| 90 to <120                                           | 1.41 (1.03, 1.92)                                                                                                              | 1.44 (0.99, 2.10)                         | 1.36 (0.79, 2.34)                             | 1.33 (0.93, 1.88)                             | 0.95 (0.50, 1.79)             | 2.40 (0.78, 7.33)                                    |
| 120 to <150 (reference)                              | 1.0                                                                                                                            | 1.0                                       | 1.0                                           | 1.0                                           | 1.0                           | 1.0                                                  |
| 150 to <180                                          | 1.18 (0.75, 1.86)                                                                                                              | 1.25 (0.70, 2.23)                         | 1.05 (0.51, 2.19)                             | 0.93 (0.55, 1.56)                             | 1.29 (0.61, 2.72)             | 1.04 (0.28, 3.87)                                    |

\*Adjusted for TAVR (vs. SAVR), BMI, NYHA (III/IV vs. I/II), peripheral vascular disease, on home oxygen, prior Atrial fibrillation/flutter, liver cirrhosis, immunosuppressive therapy, 5 meter gait speed (per 1 sec increase), does not live independently,

early stroke (any), early life threatening or disabling or major bleed, early acute kidney injury, early myocardial infarction. Early was the period between the procedure and 30 days. AVR, aortic valve replacement; TAVR, transcatheter aortic valve replacement; SAVR, surgical aortic valve replacement; BMI, body mass index; NYHA, New York Heart Association.

**Table S7. All-Cause Mortality (30 days to 1 year) – Sub-group Analyses for Early Post-AVR Diastolic Blood Pressure (DBP) in the Full Cohort (TAVR + SAVR patients).**

| <b>Interaction Variable</b>                              | <b>Interaction p-value</b> |
|----------------------------------------------------------|----------------------------|
| TAVR vs. SAVR                                            | 0.82                       |
| Patient Risk (extreme, high, intermediate)               | 0.37                       |
| Age                                                      | 0.17                       |
| Sex                                                      | 0.58                       |
| Baseline DBP                                             | 0.53                       |
| Early Post-AVR Heart Rate                                | 0.99                       |
| Early Post-AVR SBP                                       | 0.24                       |
| Early Post-AVR PP                                        | 0.56                       |
| Discharge SAC                                            | 0.06                       |
| Discharge SVR                                            | 0.61                       |
| Discharge SVI                                            | 0.72                       |
| Discharge Total AR (moderate/severe vs. none/trace/mild) | 0.27                       |
| Discharge Ejection Fraction                              | 0.64                       |
| Discharge LV mass index                                  | 0.04                       |
| Creatinine level >2 mg/dl                                | 0.45                       |
| Coronary Artery Disease                                  | 0.84                       |
| Diabetes Mellitus                                        | 0.19                       |
| Number of Blood Pressure Medications at Discharge        | 0.39                       |
| Ascending Aorta Dimension                                | 0.26                       |
| Sinotubular Junction Dimension                           | 0.18                       |
| Aortic Annulus Dimension                                 | 0.054                      |
| Sinuses of Valsalva WIDTH                                | 0.32                       |
| Sinuses of Valsalva HEIGHT                               | 0.04                       |
| Aortic Root Angulation (in degrees)                      | 0.41                       |
| Valve Size (TAVR patients only)                          | 0.99                       |
| Type of TAVR valve (CoreValve vs. Evolut R)              | 0.74                       |
| Valve Size (SAVR patients only)                          | 0.95                       |

|                              |      |
|------------------------------|------|
| 5 meter gait speed           | 0.70 |
| Fall in past 6 months        | 0.09 |
| Does not live independently  | 0.79 |
| BMI <21 (kg/m <sup>2</sup> ) | 0.15 |

Early Post-AVR diastolic blood pressure (DBP) categories were defined as 30 to <60mmHg, 60 to <80mmHg, and 80 to <100mmHg. Interactions assessed in Cox proportional hazards models. Interactions with  $p < 0.05$  were considered significant and further assessed with hazard ratios shown for each subgroup in Table S8. Abbreviations: AVR, aortic valve replacement; TAVR, transcatheter aortic valve replacement; SAVR, surgical aortic valve replacement; SBP, systolic blood pressure; PP, pulse pressure; SAC, systemic arterial compliance; SVR, systemic vascular resistance; SVI, stroke volume index; AR, aortic regurgitation; LV, left ventricular; BMI, body mass index.

**Table S8. All-Cause Mortality (30 days to 1 year) – Sub-group Analyses for Early Post-AVR Diastolic Blood Pressure (DBP) in the Full Cohort (TAVR + SAVR patients). Additional information on significant interactions seen in Table S7.**

|                                                       | Early Post-AVR DBP<br>30 to <60mmHg |                             | Early Post-AVR DBP<br>60 to <80mmHg |                             | Early Post-AVR DBP<br>80 to <100mmHg |                             | HR<br>(95% CI)<br>Early Post-AVR<br>DBP 30<br>to <60 vs.<br>60 to <80 | HR<br>(95% CI)<br>Early Post-AVR<br>DBP 80<br>to <100<br>vs. 60 to<br><80 | Interaction<br>p-value |
|-------------------------------------------------------|-------------------------------------|-----------------------------|-------------------------------------|-----------------------------|--------------------------------------|-----------------------------|-----------------------------------------------------------------------|---------------------------------------------------------------------------|------------------------|
|                                                       | N                                   | KM<br>mortality<br>rate (#) | N                                   | KM<br>mortality<br>rate (#) | N                                    | KM<br>mortality<br>rate (#) |                                                                       |                                                                           |                        |
| <b>Discharge LV mass index (≤ vs. &gt; median)</b>    |                                     |                             |                                     |                             |                                      |                             |                                                                       |                                                                           |                        |
| ≤ Median                                              | 265                                 | 16.9%<br>(44)               | 572                                 | 8.1% (46)                   | 42                                   | 2.4% (1)                    | 2.21<br>(1.46,<br>3.35)                                               | 0.29<br>(0.04,<br>2.08)                                                   | 0.14                   |
| > Median                                              | 291                                 | 15.7%<br>(45)               | 551                                 | 10.7%<br>(58)               | 36                                   | 14.3% (5)                   | 1.52<br>(1.03,<br>2.25)                                               | 1.28<br>(0.52,<br>3.20)                                                   |                        |
| <b>Sinuses of Valsalva HEIGHT (≤ vs. &gt; median)</b> |                                     |                             |                                     |                             |                                      |                             |                                                                       |                                                                           |                        |
| ≤ Median                                              | 382                                 | 13.9%<br>(52)               | 768                                 | 8.6% (65)                   | 56                                   | 5.5% (3)                    | 1.69<br>(1.18,<br>2.44)                                               | 0.61<br>(0.19,<br>1.95)                                                   | 0.38                   |
| > Median                                              | 369                                 | 15.6%<br>(57)               | 792                                 | 7.2% (56)                   | 57                                   | 9.1% (5)                    | 2.31<br>(1.60,<br>3.34)                                               | 1.25<br>(0.50,<br>3.11)                                                   |                        |
|                                                       |                                     |                             |                                     |                             |                                      |                             |                                                                       |                                                                           |                        |

AVR, aortic valve replacement; TAVR, transcatheter aortic valve replacement; SAVR, surgical aortic valve replacement; KM, Kaplan Meier; LV, left ventricular; HR, hazard ratio; CI, confidence interval.

**Table S9. All-Cause Mortality (30 days to 1 year) – Sub-group Analyses for Early Post-AVR Systolic Blood Pressure (SBP) in the Full Cohort (TAVR + SAVR patients).**

| <b>Interaction Variable</b>                              | <b>Interaction p-value</b> |
|----------------------------------------------------------|----------------------------|
| TAVR vs. SAVR                                            | 0.76                       |
| Patient Risk (extreme, high, intermediate)               | 0.39                       |
| Age                                                      | 0.87                       |
| Sex                                                      | 0.95                       |
| Baseline SBP                                             | 0.23                       |
| Early Post-AVR Heart Rate                                | 0.15                       |
| Early Post-AVR DBP                                       | 0.65                       |
| Early Post-AVR PP                                        | 0.71                       |
| Discharge SAC                                            | 0.06                       |
| Discharge SVR                                            | 0.21                       |
| Discharge SVI                                            | 0.25                       |
| Discharge Total AR (moderate/severe vs. none/trace/mild) | 0.99                       |
| Discharge Ejection Fraction                              | 0.16                       |
| Discharge LV mass index                                  | 0.27                       |
| Creatinine level >2 mg/dl                                | 0.55                       |
| Coronary Artery Disease                                  | 0.28                       |
| Diabetes Mellitus                                        | 0.04                       |
| Number of Blood Pressure Medications at Discharge        | 0.73                       |
| Ascending Aorta Dimension                                | 0.85                       |
| Sinotubular Junction Dimension                           | 0.25                       |
| Aortic Annulus Dimension                                 | 0.75                       |
| Sinuses of Valsalva WIDTH                                | 0.66                       |
| Sinuses of Valsalva HEIGHT                               | 0.78                       |
| Aortic Root Angulation (in degrees)                      | 0.64                       |
| Valve Size (TAVR patients only)                          | 0.93                       |
| Type of TAVR valve (CoreValve vs. Evolut R)              | 0.82                       |
| Valve Size (SAVR patients only)                          | 0.74                       |

|                              |      |
|------------------------------|------|
| 5 meter gait speed           | 0.81 |
| Fall in past 6 months        | 0.48 |
| Does not live independently  | 0.64 |
| BMI <21 (kg/m <sup>2</sup> ) | 0.60 |

Early Post-AVR systolic blood pressure categories were defined as 90 to <120mmHg, 120 to <150mmHg, and 150 to <180mmHg. Interactions assessed in Cox proportional hazards models. Interactions with p<0.05 were considered significant and further assessed with hazard ratios shown for each subgroup in Table S10. AVR, aortic valve replacement; TAVR, transcatheter aortic valve replacement; SAVR, surgical aortic valve replacement; DBP, diastolic blood pressure; PP, pulse pressure; SAC, systemic arterial compliance; SVR, systemic vascular resistance; SVI, stroke volume index; AR, aortic regurgitation; LV, left ventricular; BMI, body mass index.

**Table S10. All-Cause Mortality (30 days to 1 year) – Sub-group Analyses for Early Post-AVR Systolic Blood Pressure (SBP) in the Full Cohort (TAVR + SAVR patients). Additional information on significant interactions seen in Table S9.**

|                          | Early Post-AVR SBP<br>90 to <120mmHg |                             | Early Post-AVR SBP<br>120 to <150mmHg |                             | Early Post-AVR SBP<br>150 to <180mmHg |                             | HR<br>(95% CI)<br>Early<br>Post-<br>AVR<br>SBP 90<br>to <120<br>vs. 120 to<br><150 | HR<br>(95% CI)<br>Early<br>Post-<br>AVR<br>SBP 150<br>to <180<br>vs. 120 to<br><150 | Interaction<br>p-value |
|--------------------------|--------------------------------------|-----------------------------|---------------------------------------|-----------------------------|---------------------------------------|-----------------------------|------------------------------------------------------------------------------------|-------------------------------------------------------------------------------------|------------------------|
|                          | N                                    | KM<br>mortality<br>rate (#) | N                                     | KM<br>mortality<br>rate (#) | N                                     | KM<br>mortality<br>rate (#) |                                                                                    |                                                                                     |                        |
| <b>Diabetes Mellitus</b> |                                      |                             |                                       |                             |                                       |                             |                                                                                    |                                                                                     |                        |
| Yes                      | 208                                  | 13.3%<br>(27)               | 717                                   | 8.5% (60)                   | 146                                   | 13.4%<br>(19)               | 1.62<br>(1.03,<br>2.55)                                                            | 1.55<br>(0.93,<br>2.60)                                                             | 0.04                   |
| No                       | 414                                  | 14.6%<br>(60)               | 1179                                  | 8.5% (99)                   | 233                                   | 5.2% (12)                   | 1.79<br>(1.30,<br>2.47)                                                            | 0.60<br>(0.33,<br>1.09)                                                             |                        |
|                          |                                      |                             |                                       |                             |                                       |                             |                                                                                    |                                                                                     |                        |

AVR, aortic valve replacement; TAVR, transcatheter aortic valve replacement; SAVR, surgical aortic valve replacement; KM, Kaplan Meier; HR, hazard ratio; CI, confidence interval.



**Table S11. Blood Pressure Medication Utilization at discharge and 30 days based on Early Post-AVR Diastolic Blood Pressure (DBP).**

|                                                                         | <b>DBP 30 to &lt;60</b> | <b>DBP 60 to &lt;80</b> | <b>DBP 80 to 100</b> |
|-------------------------------------------------------------------------|-------------------------|-------------------------|----------------------|
| <b>Discharge medications</b>                                            |                         |                         |                      |
| Diuretics (%)                                                           | 81                      | 75                      | 73                   |
| Beta-blockers (%)                                                       | 79                      | 77                      | 81                   |
| Angiotensin-converting-enzyme (ACE) inhibitors (%)                      | 36                      | 38                      | 49                   |
| Angiotensin II receptor blockers (ARBs) (%)                             | 16                      | 17                      | 16                   |
| On 1 or more of the following: Beta blocker, ACE inhibitors, or ARB (%) | 89                      | 87                      | 93                   |
| On 2 or more of the following: Beta blocker, ACE inhibitors, or ARB (%) | 41                      | 43                      | 52                   |
| <b>30 day medications</b>                                               |                         |                         |                      |
| Diuretics (%)                                                           | 31                      | 38                      | 46                   |
| Beta-blockers (%)                                                       | 34                      | 42                      | 49                   |
| ACE inhibitors (%)                                                      | 17                      | 21                      | 32                   |
| ARBs (%)                                                                | 8                       | 11                      | 10                   |
| On 1 or more of the following: Beta blocker, ACE inhibitors, or ARB (%) | 39                      | 48                      | 57                   |
| On 2 or more of the following: Beta blocker, ACE inhibitors, or ARB (%) | 19                      | 25                      | 34                   |

Data reported as % of patients in each DBP category taking the medication(s) at discharge or 30 days.  
 AVR, aortic valve replacement.

**Table S10. Blood Pressure Medication Utilization at discharge and 30 days based on Early Post-AVR Systolic Blood Pressure (SBP).**

|                                                                         | <b>SBP 90 to &lt;120</b> | <b>SBP 120 to &lt;150</b> | <b>SBP 150 to 180</b> |
|-------------------------------------------------------------------------|--------------------------|---------------------------|-----------------------|
| <b>Discharge medications</b>                                            |                          |                           |                       |
| Diuretics (%)                                                           | 81                       | 76                        | 70                    |
| Beta-blockers (%)                                                       | 81                       | 77                        | 76                    |
| Angiotensin-converting-enzyme (ACE) inhibitors (%)                      | 36                       | 39                        | 40                    |
| Angiotensin II receptor blockers (ARBs) (%)                             | 12                       | 17                        | 23                    |
| On 1 or more of the following: Beta blocker, ACE inhibitors, or ARB (%) | 87                       | 89                        | 88                    |
| On 2 or more of the following: Beta blocker, ACE inhibitors, or ARB (%) | 40                       | 42                        | 48                    |
| <b>30 day medications</b>                                               |                          |                           |                       |
| Diuretics (%)                                                           | 37                       | 36                        | 38                    |
| Beta-blockers (%)                                                       | 40                       | 39                        | 42                    |
| ACE inhibitors (%)                                                      | 19                       | 21                        | 24                    |
| ARBs (%)                                                                | 6                        | 10                        | 15                    |
| On 1 or more of the following: Beta blocker, ACE inhibitors, or ARB (%) | 43                       | 45                        | 51                    |
| On 2 or more of the following: Beta blocker, ACE inhibitors, or ARB (%) | 22                       | 23                        | 29                    |

Data reported as % of patients in each SBP category taking the medication(s) at discharge or 30 days.

**Figure S1. Post-AVR Diastolic and Systolic Blood Pressures and Mortality (excluding patients with moderate or severe total AR on the discharge echocardiogram) (Sensitivity Analysis).**

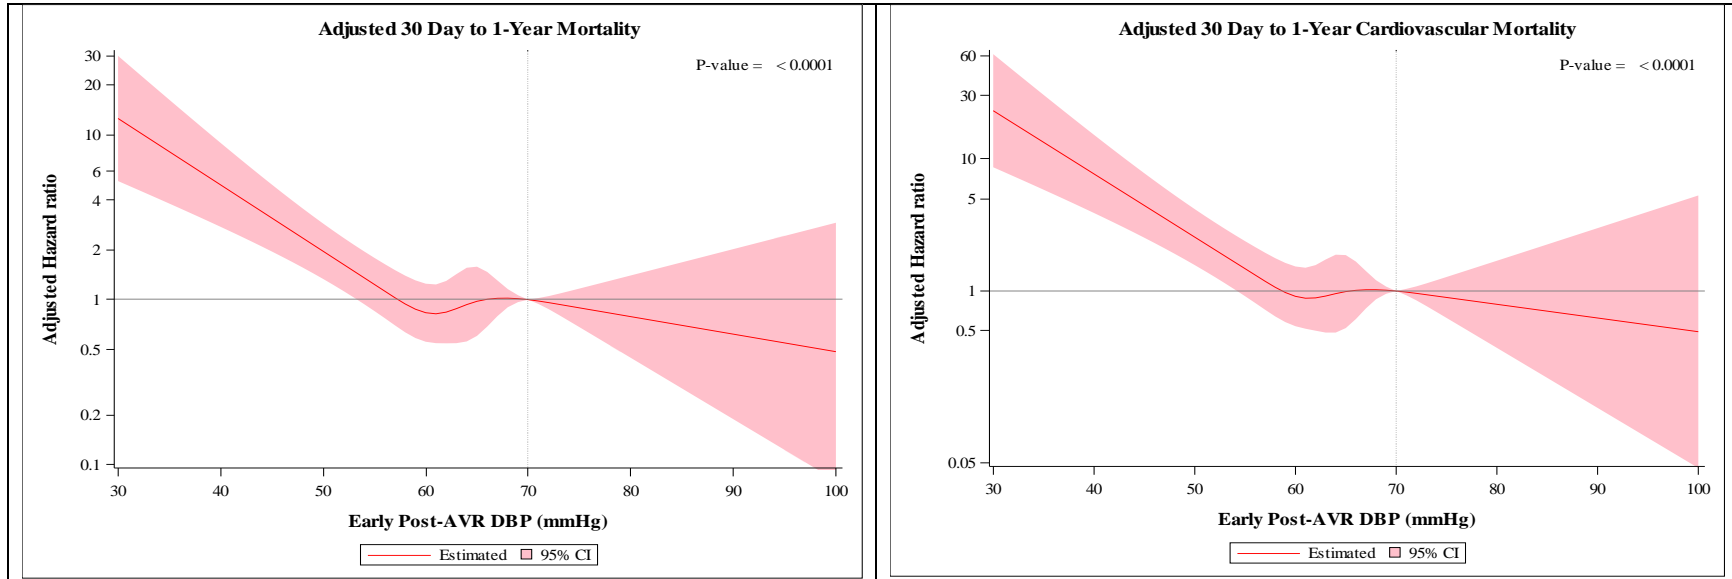

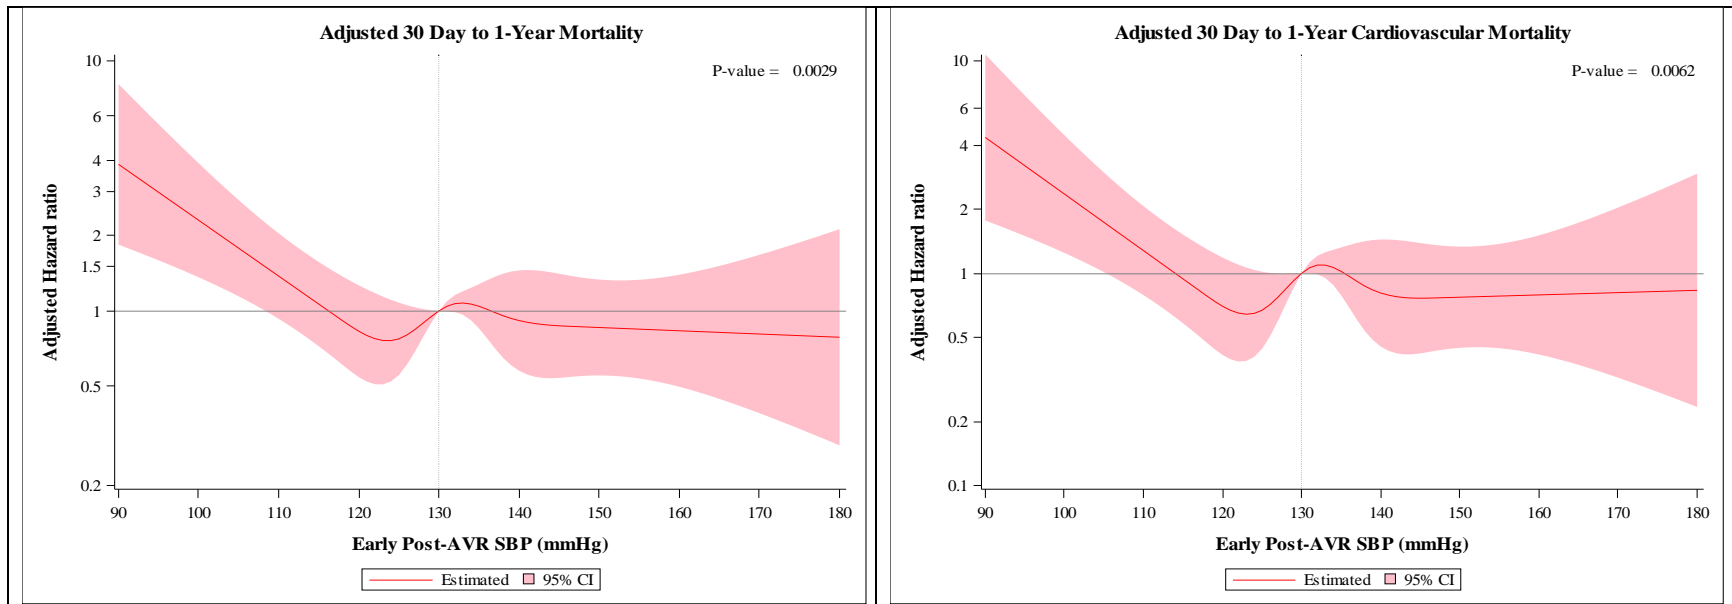

Cox proportional hazard models were performed using restricted cubic splines technique. The association between early post-AVR diastolic blood pressure (DBP) and all-cause (a) and cardiovascular (b) 30 day to 1 year mortality are shown as well as the association between early post-AVR systolic blood pressure (SBP) and all-cause (c) and cardiovascular (d) 30 day to 1 year mortality. Adjustment was made for: TAVR (vs. SAVR), BMI, NYHA (III/IV vs. I/II), peripheral vascular disease, home oxygen use, prior atrial fibrillation/flutter, liver cirrhosis, immunosuppressive therapy, 5 meter gait speed, independent living, early stroke, early life threatening or disabling or major bleed, acute kidney injury, and early myocardial infarction. AVR, aortic valve replacement; TAVR, transcatheter aortic valve replacement; SAVR, surgical aortic valve replacement; BMI, body mass index; NYHA, New York Heart Association.

**Figure S2. Discharge and 30 Day Systolic Blood Pressure and Outcomes.**

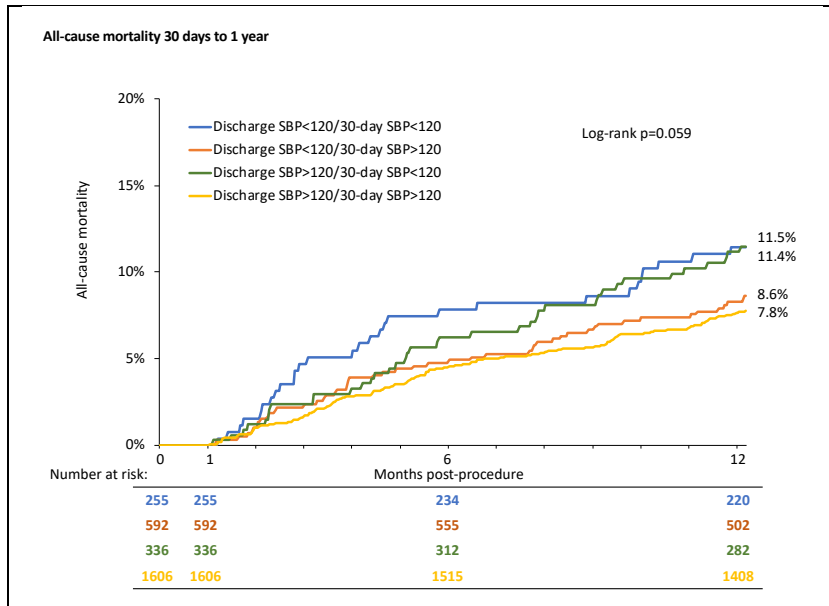

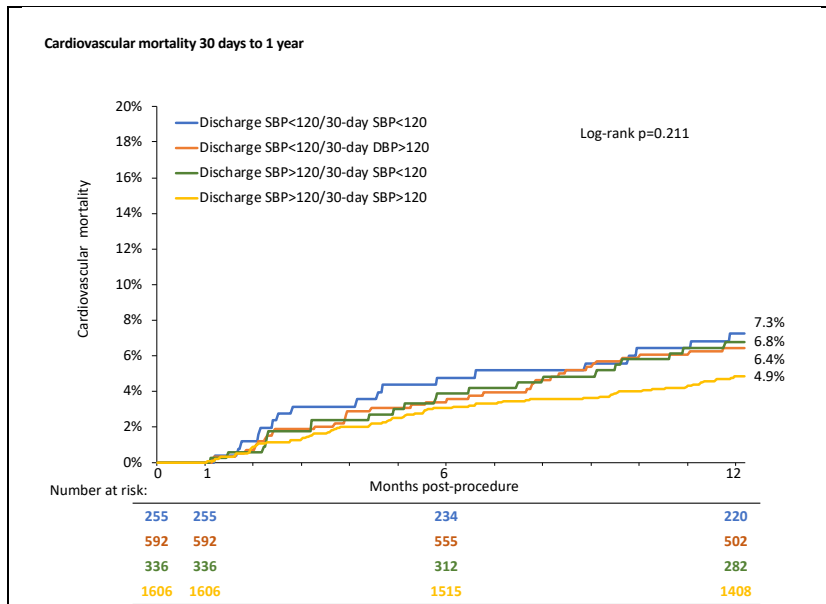

Kaplan-Meier curves are shown for all-cause (a) and cardiovascular (b) mortality between 30 days and 1 year for diastolic blood pressure (DBP) groups defined by discharge systolic blood pressure (SBP)  $\geq 120$  versus  $< 120$  mmHg and 30-day SBP  $\geq 120$  versus  $< 120$  mmHg.

**Figure S3. Post-AVR Diastolic Blood Pressures and Clinical Outcomes.**

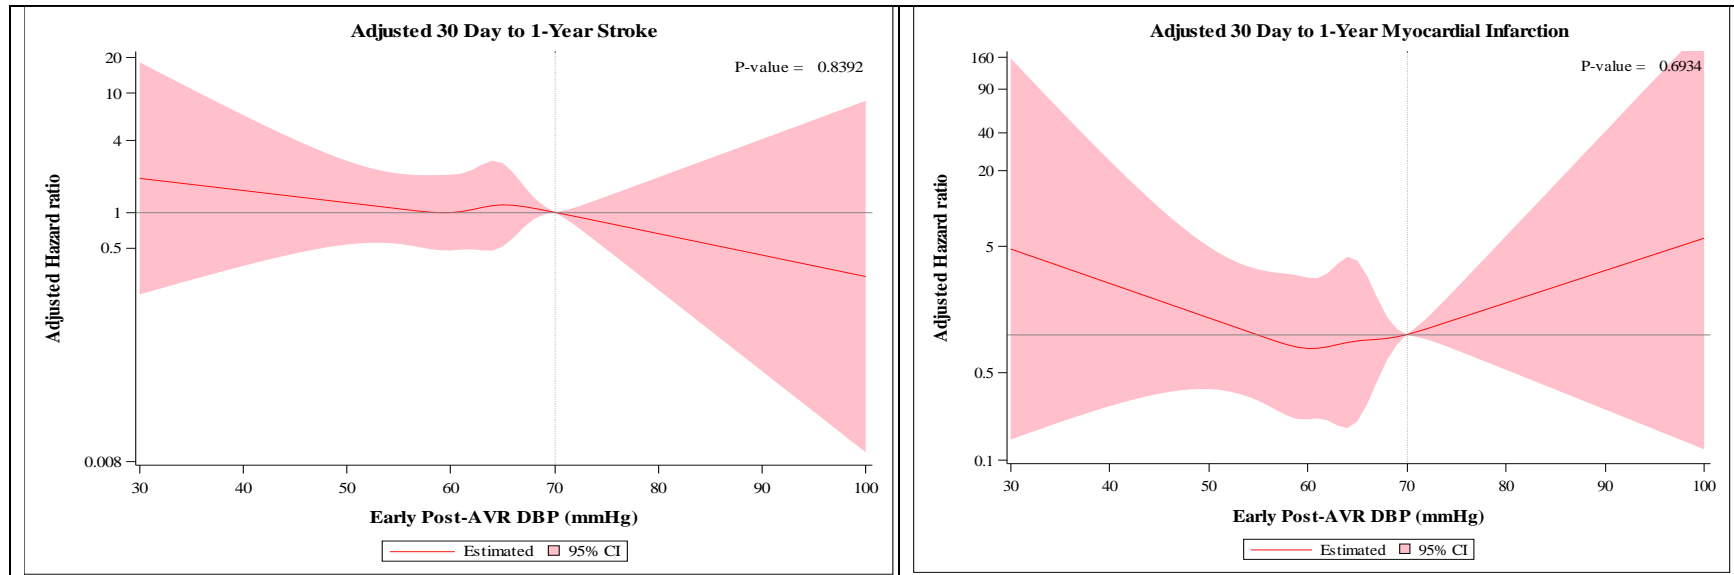

Cox proportional hazard models were performed using restricted cubic splines technique. The associations between early post-AVR diastolic blood pressure (DBP) and stroke (a) and myocardial infarction (b) between 30 days and 1 year are shown. Adjustment was made for: TAVR (vs. SAVR), BMI, NYHA (III/IV vs. I/II), peripheral vascular disease, home oxygen use, prior atrial fibrillation/flutter, liver cirrhosis, immunosuppressive therapy, 5 meter gait speed, independent living, early stroke, early life threatening or disabling or major bleed, acute kidney injury, and early myocardial infarction. AVR, aortic valve replacement; TAVR, transcatheter aortic valve replacement; SAVR, surgical aortic valve replacement; BMI, body mass index; NYHA, New York Heart Association.

**Figure S4. Post-AVR Systolic Blood Pressures and Clinical Outcomes.**

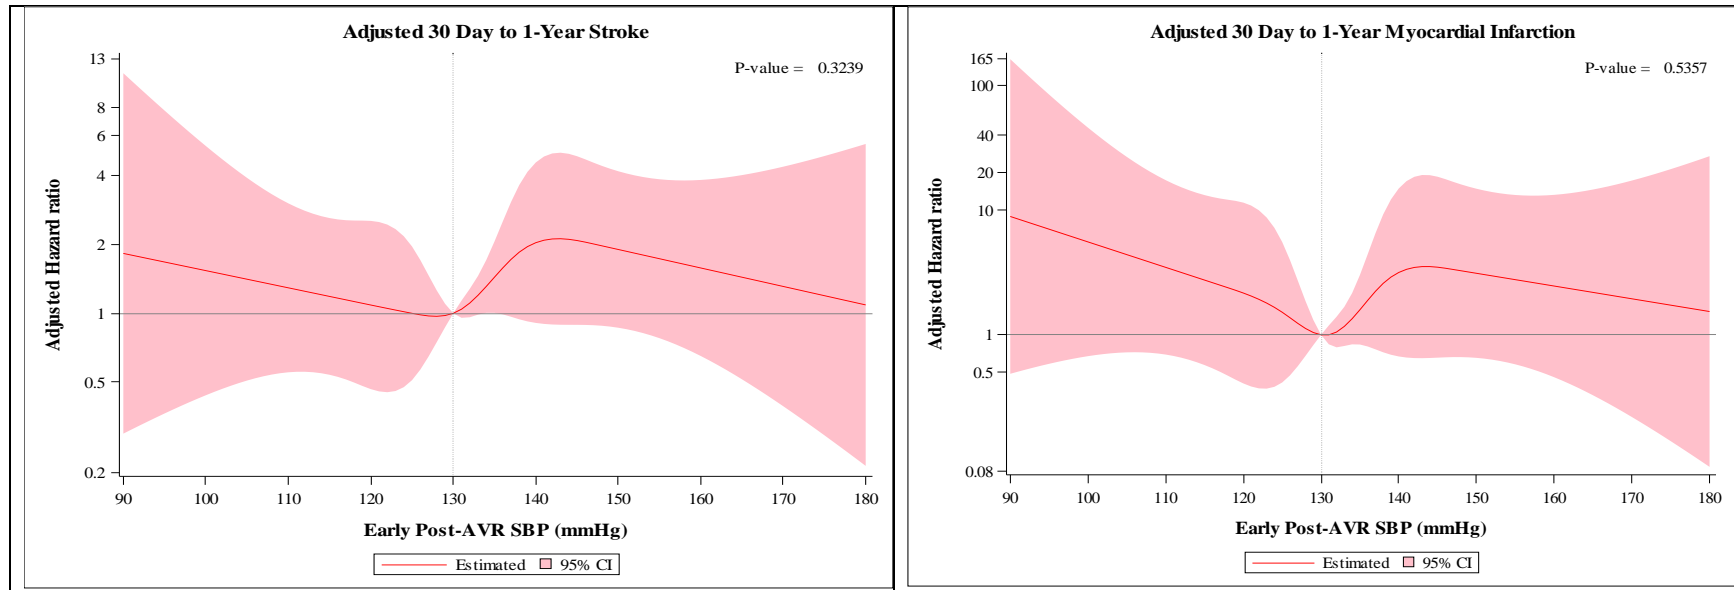

Cox proportional hazard models were performed using restricted cubic splines technique. The associations between early post-AVR systolic blood pressure (SBP) and stroke (a) and myocardial infarction (b) between 30 days and 1 year are shown. Adjustment was made for: TAVR (vs. SAVR), BMI, NYHA (III/IV vs. I/II), peripheral vascular disease, home oxygen use, prior atrial fibrillation/flutter, liver cirrhosis, immunosuppressive therapy, 5 meter gait speed, independent living, early stroke, early life threatening or disabling or major bleed, acute kidney injury, and early myocardial infarction. AVR, aortic valve replacement; TAVR, transcatheter aortic valve replacement; SAVR, surgical aortic valve replacement; BMI, body mass index; NYHA, New York Heart Association.
